# Supplementary material for: Operational research to support equitable non-communicable disease policy in low-income and middle-income countries in the sustainable development era: a scoping review
Source: PubMed Central journal article supplement (PMC7328817; doi:10.1136/bmjgh-2019-002259), 2020-06-30
Supplement: bmjgh-2019-002259supp001.pdf [file bmjgh-2019-002259supp001.pdf]

## Contents

|                                                       |   |
|-------------------------------------------------------|---|
| Appendix 1:.....                                      | 1 |
| Inclusion criteria for non-communicable disease ..... | 1 |
| Search Strategy .....                                 | 2 |
| Web of Science .....                                  | 2 |
| Scopus.....                                           | 3 |
| Embase.....                                           | 3 |
| Medline .....                                         | 5 |

## Appendix 1

### Inclusion criteria for non-communicable disease

As outlined in the manuscript the list of non-communicable diseases was taken from the WHO Global Health Estimates (WHO, 2016) and Global Burden of Disease project (IHME, 2018).

During the review process all four authors spent some time discussing which papers should be included based on the health condition of focus in the paper. One contentious area may be the inclusion of child and maternal malnutrition, under which three studies were included in the review (Botteman and Detzel, 2015; Dainelli et al., 2017; Vosti et al., 2015). The WHO Global Health Estimates and GBD places nutritional deficiencies under “Communicable, maternal, perinatal and nutritional conditions”, rather than non-communicable diseases. However, given the central role played by in-utero and early-life diet on the non-communicable disease burden in later life (WHO, 2018), as well as its potentially inequitable impact across population subgroups (Di Cesare et al., 2013), the authors deemed it reasonable to include the above studies of nutritional interventions in the review. There were other conditions, such as HPV infection and acute rheumatic fever, which are not non-communicable diseases but were included due to their substantial impact on the non-communicable disease burden - through cervical cancer (Guerrero et al., 2015; Levin et al., 2015; Mo et al., 2017; Setiawan et al., 2016) and rheumatic heart disease (Watkins et al., 2015; 2016), respectively.

Botteman M, Detzel P, 2017, *see reference 7 in manuscript Appendix Reference*  
 Dainelli L, et al., 2017, *see reference 8 in manuscript Appendix Reference*  
 Vosti SA, et al., 2015, *see reference 9 in manuscript Appendix Reference*  
 Di Cesare M, Khang Y-H, Asaria P, et al., 2013, *Inequalities in non-communicable diseases and effective responses*, The Lancet, 381(9866): 585-97  
 Guerrero AM, et al., 2015, *see reference 48 in manuscript Appendix Reference*  
 Levin CE, et al., 2015, *see reference 49 in manuscript Appendix Reference*  
 Mo X, et al., 2017, *see reference 50 in manuscript Appendix Reference*  
 Setiawan D, et al., 2016, *see reference 51 in manuscript Appendix Reference*  
 Watkins DA, et al., 2015, *see reference 94 in manuscript Appendix Reference*  
 Watkins DA, et al., 2016, *see reference 95 in manuscript Appendix Reference*

## Search Strategy

### Web of Science

|                                                                                                                                                                                                                                                                                                                                                                                                                                                                                                                                                                                                                                                                                                                                                                                                                                                                                                                                                                                                                                                                                                                                                                                                                                                                                                                                                                                                                                                                                                                                                                                                                                                                                                                                                                                                                                                                                                                                                                                                                                                                                                                                                                                                                                                                                                                                                                                                                                                            |
|------------------------------------------------------------------------------------------------------------------------------------------------------------------------------------------------------------------------------------------------------------------------------------------------------------------------------------------------------------------------------------------------------------------------------------------------------------------------------------------------------------------------------------------------------------------------------------------------------------------------------------------------------------------------------------------------------------------------------------------------------------------------------------------------------------------------------------------------------------------------------------------------------------------------------------------------------------------------------------------------------------------------------------------------------------------------------------------------------------------------------------------------------------------------------------------------------------------------------------------------------------------------------------------------------------------------------------------------------------------------------------------------------------------------------------------------------------------------------------------------------------------------------------------------------------------------------------------------------------------------------------------------------------------------------------------------------------------------------------------------------------------------------------------------------------------------------------------------------------------------------------------------------------------------------------------------------------------------------------------------------------------------------------------------------------------------------------------------------------------------------------------------------------------------------------------------------------------------------------------------------------------------------------------------------------------------------------------------------------------------------------------------------------------------------------------------------------|
| Each category combined with "AND". Restricted to English and year 2015 or later. Search run on 10 <sup>th</sup> May 2018                                                                                                                                                                                                                                                                                                                                                                                                                                                                                                                                                                                                                                                                                                                                                                                                                                                                                                                                                                                                                                                                                                                                                                                                                                                                                                                                                                                                                                                                                                                                                                                                                                                                                                                                                                                                                                                                                                                                                                                                                                                                                                                                                                                                                                                                                                                                   |
| <p><u>Search 1 – model type</u><br/> TS=("operation* research")OR<br/> TS=(model* NEAR/5 (mathematical or quer* or inventory or scheduling or demand or forecast* or comput* or network or stochastic or decision* or delivery or simulation or optimi?ation or non-linear or linear or Markov or cost-effectiveness or agent-based)) OR<br/> TS=(optimi?ation\$ NEAR/5 (mathematical or nonlinear or non-linear or linear or network or discrete or multicriteria or multi-criteria or stochastic or problem or minimi?ation or location or allocation)) OR<br/> TS=(simulation NEAR/3 (comput* or discrete or agent-based or system\$))</p>                                                                                                                                                                                                                                                                                                                                                                                                                                                                                                                                                                                                                                                                                                                                                                                                                                                                                                                                                                                                                                                                                                                                                                                                                                                                                                                                                                                                                                                                                                                                                                                                                                                                                                                                                                                                              |
| <p><u>Search 2 – geographic focus</u><br/> TS=("Developing countr*" or "low-income countr*" or "middle-income countr*" or "developing world" or "developing nation" or "low-resource setting*" or "resource-constrained setting*" or "resource-poor setting*" or "limited-resource setting*" or "resource-limited setting*" or "under-developed countr*" or "least-developed countr*" or "less-developed countr*" or LMIC* or Africa* or (Asia* NEAR/2 south) or (Asia NEAR/2 east) or "latin America*" or "central America*" or "south america*" or caribbean* or "middle east" or AFGHANISTAN or ALBANIA or ALGERIA or "AMERICAN SAMOA" or ANGOLA or ARGENTINA or ARMENIA or AZERBAIJAN or BANGLADESH or BELARUS or BELIZE or BENIN or BHUTAN or BOLIVIA or "BOSNIA AND HERZEGOVINA" or BOTSWANA or BRAZIL or BULGARIA or "BURKINA FASO" or BURUNDI or "CABO VERDE" or CAMBODIA or CAMEROON or "CENTRAL AFRICAN REPUBLIC" or CHAD or CHINA or COLOMBIA or COMOROS or "CONGO, DEM. REP." or "CONGO, REP." or "COSTA RICA" or "COTE D'IVOIRE" or CUBA or DJIBOUTI or DOMINICA or "DOMINICAN REPUBLIC" or ECUADOR or "EGYPT" or "EL SALVADOR" or "EQUATORIAL GUINEA" or "ERITREA" or "ETHIOPIA" or FIJI or GABON or "THE GAMBIA" or GEORGIA or GHANA or GRENADA or GUATEMALA or GUINEA or GUINEA-BISSAU or GUYANA or HAITI or HONDURAS or INDIA or INDONESIA or IRAN or IRAQ or JAMAICA or JORDAN or KAZAKHSTAN or KENYA or KIRIBATI or KOREA or KOSOVO or KYRGYZ* or LAO or LAOS or LEBANON or LESOTHO or LIBERIA or LIBYA or MACEDONIA or MADAGASCAR or MALAWI or MALAYSIA or MALDIVES or MALI or "MARSHALL ISLANDS" or MAURITANIA or MAURITIUS or MEXICO or MICRONESIA or MOLDOVA or MONGOLIA or MONTENEGRO or MOROCCO or MOZAMBIQUE or MYANMAR or NAMIBIA or NEPAL or NICARAGUA or NIGER or NIGERIA or PAKISTAN or PANAMA or "PAPUA NEW GUINEA" or PARAGUAY or PERU or PHILIPPINES or ROMANIA or RUSSIA* or RWANDA or SAMOA or "SAO TOME AND PRINCIPE" or SENEGAL or SERBIA or "SIERRA LEONE" or "SOLOMON ISLANDS" or SOMALIA or "SOUTH AFRICA" or "SOUTH SUDAN" or "SRI LANKA" or "ST. LUCIA" or "ST. VINCENT AND THE GRENADINES" or SUDAN or SURINAME or SWAZILAND or "SYRIAN ARAB REPUBLIC" or TAJIKISTAN or TANZANIA or THAILAND or "TIMOR-LESTE" or TOGO or TONGA or TUNISIA or TURKEY or TURKMENISTAN or TUVALU or UGANDA or UKRAINE or UZBEKISTAN or VANUATU or VENEZUELA or VIETNAM or "WEST BANK AND GAZA" or YEMEN or ZAMBIA or ZIMBABWE)</p> |
| <p><u>Search 3 - relating to health</u><br/> TS=(health* or medical or hospital or clinic* or treatment) OR AD=(health or hlth)</p>                                                                                                                                                                                                                                                                                                                                                                                                                                                                                                                                                                                                                                                                                                                                                                                                                                                                                                                                                                                                                                                                                                                                                                                                                                                                                                                                                                                                                                                                                                                                                                                                                                                                                                                                                                                                                                                                                                                                                                                                                                                                                                                                                                                                                                                                                                                        |
| <p><u>Search 4 - relating to decision/policy making</u><br/> TS=(polic* or decision-mak* or decision-support or decision-process or decision-aid* or implement* or impact) or AD=(policy)</p>                                                                                                                                                                                                                                                                                                                                                                                                                                                                                                                                                                                                                                                                                                                                                                                                                                                                                                                                                                                                                                                                                                                                                                                                                                                                                                                                                                                                                                                                                                                                                                                                                                                                                                                                                                                                                                                                                                                                                                                                                                                                                                                                                                                                                                                              |
| <p><u>Search 5 - relating to NCD</u><br/> TS=(NCD* or "non-communicable disease" or "non-communicable disease" or "chronic disease" or "chronic illness" or "cardiovascular disease" or stroke or "heart attack" or cancer* or "respiratory disease*" or "chronic obstructive pulmonary disease" or asthma or diabetes or alcohol or drink* or smok* or tobacco or "physical inactivity" or "unhealthy diet" or obesity or "mental health" or "hypertension" or "depression" or Neoplasm* or "Musculoskeletal disease" or "Digestive system disease" or "Stomatognathic disease" or "Respiratory tract disease" or "Otorhinolaryngologic disease" or "Nervous system disease" or "Eye disease" or "Male urogenital disease" or "Female urogenital disease" or "pregnancy complications" or "Hemic and lymphatic disease" or "Congenital disease" or "hereditary disease" or "neonatal disease" or "Congenital abnormalities" or "hereditary abnormalities" or "neonatal abnormalities" or "Skin disease" or "connective tissue disease" or "Nutritional disease" or "metabolic disease" or "Endocrine system disease" or "Immune system disease" or "Mental disorder" or "bone disease" or "joint disease" or "rheumatic disease" or "liver disease" or "pancreatic disease" or "mouth disease" or "lung disease" or "central nervous system disease" or "neuromuscular disease" or "vision disorder" or "heart disease" or "vascular disease" or "anemia" or "blood coagulation disorder" or "thyroid disease" or "autoimmune disease"</p>                                                                                                                                                                                                                                                                                                                                                                                                                                                                                                                                                                                                                                                                                                                                                                                                                                                                                                                |

## Scopus

**Keyword search.** TITLE-ABS-KEY search, where KEY includes author keywords and controlled indexed terms in searched databases. Scopus automatically searches plural versions of words, as well as US-UK spelling variations. Each category combined with "AND". Restricted to English and year 2015 or later. Search run on 10<sup>th</sup> May 2018

### Model types

TITLE-ABS-KEY("operation\* research") OR  
 TITLE-ABS-KEY(model\* W/5 (mathematical or queu\* or inventory or scheduling or demand or forecast\* or comput\* or network or stochastic or decision\* or delivery or simulation or optimization or non-linear or nonlinear or linear or Markov or cost-effectiveness or agent-based)) OR  
 TITLE-ABS-KEY(optimization W/5 (mathematical or nonlinear or non-linear or linear or network or discrete or multicriteria or multi-criteria or stochastic or problem or minimization or maximization or location or allocation)) OR  
 TITLE-ABS-KEY(simulation W/3 (comput\* or discrete or agent-based or system\$))

### Geographic focus

TITLE-ABS-KEY("low-resource setting\*" or "resource-constrained setting\*" or "resource-poor setting\*" or "limited-resource setting\*" or "resource-limited setting\*" or Africa\* or (Asia\* W/2 south) or (Asia\* W/2 east) or "latin America\*" or "central America\*" or "south america\*" or caribbean or "west indies" or "middle east")  
 TITLE-ABS-KEY((countr\* or nation\* or population\* or world) W/0 (developing or "less\* developed" or "under developed" or "least-developed" or underdeveloped or "middle income" or "middle-income" or "low-income" or "low\* income" or underserved or "under served" or deprived or poor\*))  
 TITLE-ABS-KEY(econom\* W/0 (developing or "less\* developed" or "under developed" or underdeveloped or "middle income" or middle-income or "low\* income" or low-income))  
 TITLE-ABS-KEY(low\* W/0 (gdp or gnp or "gross domestic" or "gross national"))  
 TITLE-ABS-KEY(lmic\* or "third world" or "lami countr\*" or "transitional countr\*")  
 TITLE-ABS-KEY(*The names of all countries included in the World Bank LMIC classification 2018*)

### Health

TITLE-ABS-KEY(health\* or medical or hospital or clinic\* or treatment) or AFFIL(health)

### Decision-/policy-making

TITLE-ABS-KEY(polic\* or decision-mak\* or decision-support or decision-process or decision-aid\* or implement\* or impact) OR AFFIL(policy)

### NCDs

TITLE-ABS-KEY(NCD\* or "noncommunicable disease" or "non-communicable disease" or "chronic disease" or "chronic illness" or "cardiovascular disease" or stroke or "heart attack" or cancer\* or "respiratory disease\*" or "chronic obstructive pulmonary disease" or COPD or asthma or diabet\* or alcohol or drink\* or smok\* or tobacco or "physical inactivity" or "unhealthy diet" or obes\* or "mental health" or hypertension or depression or Neoplasm\* or "Musculoskeletal disease" or "Digestive system disease" or "Stomatognathic disease" or "Respiratory tract disease" or "Otorhinolaryngologic disease" or "Nervous system disease" or "Eye disease" or "Male urogenital disease" or "Female urogenital disease" or "pregnancy complications" or "Hemic and lymphatic disease" or "Congenital disease" or "hereditary disease" or "neonatal disease" or "Congenital abnormalities" or "hereditary abnormalities" or "neonatal abnormalities" or "Skin disease" or "connective tissue disease" or "Nutritional disease" or "metabolic disease" or "Endocrine system disease" or "Immune system disease" or "Mental disorder" or "bone disease" or "joint disease" or "rheumatic disease" or "liver disease" or "pancreatic disease" or "mouth disease" or "lung disease" or "central nervous system disease" or "neuromuscular disease" or "vision disorder" or "heart disease" or "vascular disease" or "anemia" or "blood coagulation disorder" or "thyroid disease" or "autoimmune disease")

## Embase

**Ovid Embase – Search run on 10<sup>th</sup> May 2018**

|                    |   | <b>MeSH subject headings/Custom search<br/>Explode and Focus all subject headings</b> | <b>Hits</b> |
|--------------------|---|---------------------------------------------------------------------------------------|-------------|
| <i>Model types</i> | 1 | Decision support system                                                               | 9712        |
|                    | 2 | Economic model                                                                        | 498         |
|                    | 3 | Statistical model                                                                     | 21239       |
|                    | 4 | Monte Carlo method                                                                    | 5262        |
|                    | 5 | Markov chain                                                                          | 419         |
|                    | 6 | Algorithms                                                                            | 56280       |
|                    | 7 | Decision theory                                                                       | 507         |
|                    | 8 | Decision trees                                                                        | 1290        |

|                         |    |                                                                                                                                                                                                                                                                                                                                                                                                                                                                                                                                                                                                                                                                                                                                                                                                                                                                                                                                                                                                                                                                                                                                                                                                                                                                                                                                                                                                                                                                                                                                                                                                                                                                                                                                                                                                                                                                                                         |         |
|-------------------------|----|---------------------------------------------------------------------------------------------------------------------------------------------------------------------------------------------------------------------------------------------------------------------------------------------------------------------------------------------------------------------------------------------------------------------------------------------------------------------------------------------------------------------------------------------------------------------------------------------------------------------------------------------------------------------------------------------------------------------------------------------------------------------------------------------------------------------------------------------------------------------------------------------------------------------------------------------------------------------------------------------------------------------------------------------------------------------------------------------------------------------------------------------------------------------------------------------------------------------------------------------------------------------------------------------------------------------------------------------------------------------------------------------------------------------------------------------------------------------------------------------------------------------------------------------------------------------------------------------------------------------------------------------------------------------------------------------------------------------------------------------------------------------------------------------------------------------------------------------------------------------------------------------------------|---------|
|                         | 9  | Systems theory                                                                                                                                                                                                                                                                                                                                                                                                                                                                                                                                                                                                                                                                                                                                                                                                                                                                                                                                                                                                                                                                                                                                                                                                                                                                                                                                                                                                                                                                                                                                                                                                                                                                                                                                                                                                                                                                                          | 898     |
|                         | 10 | Computer analysis                                                                                                                                                                                                                                                                                                                                                                                                                                                                                                                                                                                                                                                                                                                                                                                                                                                                                                                                                                                                                                                                                                                                                                                                                                                                                                                                                                                                                                                                                                                                                                                                                                                                                                                                                                                                                                                                                       | 4213    |
|                         | 11 | Computer simulation                                                                                                                                                                                                                                                                                                                                                                                                                                                                                                                                                                                                                                                                                                                                                                                                                                                                                                                                                                                                                                                                                                                                                                                                                                                                                                                                                                                                                                                                                                                                                                                                                                                                                                                                                                                                                                                                                     | 17550   |
|                         | 12 | Mathematical computing                                                                                                                                                                                                                                                                                                                                                                                                                                                                                                                                                                                                                                                                                                                                                                                                                                                                                                                                                                                                                                                                                                                                                                                                                                                                                                                                                                                                                                                                                                                                                                                                                                                                                                                                                                                                                                                                                  | 3233    |
|                         | 13 | Systems analysis                                                                                                                                                                                                                                                                                                                                                                                                                                                                                                                                                                                                                                                                                                                                                                                                                                                                                                                                                                                                                                                                                                                                                                                                                                                                                                                                                                                                                                                                                                                                                                                                                                                                                                                                                                                                                                                                                        | 5559    |
|                         | 14 | Probability theory                                                                                                                                                                                                                                                                                                                                                                                                                                                                                                                                                                                                                                                                                                                                                                                                                                                                                                                                                                                                                                                                                                                                                                                                                                                                                                                                                                                                                                                                                                                                                                                                                                                                                                                                                                                                                                                                                      | 2735    |
|                         | 15 | Cost benefit analysis                                                                                                                                                                                                                                                                                                                                                                                                                                                                                                                                                                                                                                                                                                                                                                                                                                                                                                                                                                                                                                                                                                                                                                                                                                                                                                                                                                                                                                                                                                                                                                                                                                                                                                                                                                                                                                                                                   | 10049   |
|                         | 16 | Health services research                                                                                                                                                                                                                                                                                                                                                                                                                                                                                                                                                                                                                                                                                                                                                                                                                                                                                                                                                                                                                                                                                                                                                                                                                                                                                                                                                                                                                                                                                                                                                                                                                                                                                                                                                                                                                                                                                | 9525    |
|                         | 17 | ((operation* adj1 research) OR (model* adj5 (mathematical or queue* or inventory or scheduling or demand or forecast* or comput* or network or stochastic or decision* or delivery or simulation or optimi#ation or linear or nonlinear or non-linear or Markov or cost-effectiveness or agent-based)) OR (optimi#ation\$1 adj5 (mathematical or nonlinear or non-linear or linear or network or discrete or multi-criteria or multicriteria or stochastic or problem or minimi#ation or maximi#ation or location or allocation)) OR (simulation adj3 (comput* or discrete or agent-based or system\$1))).ti,ab.                                                                                                                                                                                                                                                                                                                                                                                                                                                                                                                                                                                                                                                                                                                                                                                                                                                                                                                                                                                                                                                                                                                                                                                                                                                                                        | 329370  |
|                         | 18 | OR (1 to 17)                                                                                                                                                                                                                                                                                                                                                                                                                                                                                                                                                                                                                                                                                                                                                                                                                                                                                                                                                                                                                                                                                                                                                                                                                                                                                                                                                                                                                                                                                                                                                                                                                                                                                                                                                                                                                                                                                            | 448673  |
| <i>Geographic focus</i> | 25 | ("low-resource setting*" or "resource-constrained setting*" or "resource-poor setting*" or "limited-resource setting*" or "resource-limited setting*" or Africa* or (Asia* adj2 south) or (Asia adj2 east) or "latin America*" or "central America*" or "south america*" or caribbean or "west indies" or "middle east").ti,ab.                                                                                                                                                                                                                                                                                                                                                                                                                                                                                                                                                                                                                                                                                                                                                                                                                                                                                                                                                                                                                                                                                                                                                                                                                                                                                                                                                                                                                                                                                                                                                                         | 324864  |
|                         | 26 | ((count#* or nation* or population* or world) adj0 (developing or "less* developed" or "under developed" or "least-developed" or underdeveloped or "middle income" or "middle-income" or "low-income" or "low* income" or underserved or "under served" or deprived or poor*).ti,ab.                                                                                                                                                                                                                                                                                                                                                                                                                                                                                                                                                                                                                                                                                                                                                                                                                                                                                                                                                                                                                                                                                                                                                                                                                                                                                                                                                                                                                                                                                                                                                                                                                    | 945     |
|                         | 27 | (econom* adj0 (developing or "less* developed" or "under developed" or underdeveloped or "middle income" or middle-income or "low* income" or low-income)).ti,ab.                                                                                                                                                                                                                                                                                                                                                                                                                                                                                                                                                                                                                                                                                                                                                                                                                                                                                                                                                                                                                                                                                                                                                                                                                                                                                                                                                                                                                                                                                                                                                                                                                                                                                                                                       | 221     |
|                         | 28 | (low* adj0 (gdp or gnp or "gross domestic" or "gross national")).ti,ab.                                                                                                                                                                                                                                                                                                                                                                                                                                                                                                                                                                                                                                                                                                                                                                                                                                                                                                                                                                                                                                                                                                                                                                                                                                                                                                                                                                                                                                                                                                                                                                                                                                                                                                                                                                                                                                 | 311     |
|                         | 29 | (lmic* or third world or lami countr* or transitional countr*).ti,ab.                                                                                                                                                                                                                                                                                                                                                                                                                                                                                                                                                                                                                                                                                                                                                                                                                                                                                                                                                                                                                                                                                                                                                                                                                                                                                                                                                                                                                                                                                                                                                                                                                                                                                                                                                                                                                                   | 6795    |
|                         | 30 | (AFGHANISTAN or ALBANIA or ALGERIA or "AMERICAN SAMOA" or ANGOLA or ARGENTINA or ARMENIA or ARMENIAN or AZERBAIJAN or BANGLADESH or BELARUS or BYELARUS or BYELORUSSIAN or BELORUSSIA* or BELIZE or BENIN or BHUTAN or BOLIVIA or BOSNIA or "BOSNIA AND HERZEGOVINA" or HERZEGOVINA or HERCEGOVINA or BOTSWANA or BRASIL or BRAZIL or BULGARIA or "BURKINA FAS#O" or BURUNDI or URINDI or CAMBODIA or "KHMER REPUBLIC" or "KAMPUCHEA or CAMERO*" or "CAPE VERDE" OR "CABO VERDE" or "CENTRAL AFRICAN REPUBLIC" or CHAD or CHINA or COLOMBIA or COMOR* or "COMORO ISLANDS" or MAYOTTE or CONGO or ZAIRE or "COSTA RICA" or "COTE D'IVOIRE" or "IVORY COAST" or CUBA or DJIBOUTI or "FRENCH SOMALILAND" or DOMINICA* or ECUADOR or EGYPT or "UNITED ARAB REPUBLIC" or "EL SALVADOR" or "EQUATORIAL GUINEA" or ERITREA or ETHIOPIA or FIJI or GABON* or GAMBIA or GEORGIA* or GHANA or GRENADA or GUATEMALA or GUINEA or GUAM or GUINEA-BISSAU or GUIANA or GUYANA or HAITI or HONDURAS or INDIA or MALDIVES or INDONESIA or IRAN<br><br>or IRAQ or JAMAICA or JORDAN or KAZAKH* or KENYA or KIRIBATI or KOREA or KOSOVO or KYRGYZ* or KIRGHIZ* or KIRGIZSTAN or LAO* or LEBANON or LESOTHO or BASUTOLAND or LIBERIA or LIBYA or MACEDONIA or MADAGASCAR or MALAGASY or MALAWI or MALAY* or SABAH or SARAWAK or MALDIVES or MALI or "MARSHALL ISLANDS" or MAURITANIA or MAURITIUS or "AGALEGA ISLANDS" or MEXICO or MICRONESIA or "MIDDLE EAST" or MOLDOV* or MONGOLIA or MONTENEGRO or MOROCCO or IFNI or MOZAMBIQUE or MYANMA* or BURMA or NAMIBIA or NEPAL or "NETHERLANDS ANTILLES" or NICARAGUA or NIGER*<br><br>or "NORTHERN MARIANA ISLANDS" or PAKISTAN or PANAMA or "PAPUA NEW GUINEA" or PARAGUAY or PERU or PHI#LIP#INES or ROMANIA or RUMANIA or ROUMANIA or RUSSIA* or R#ANDA or SAMOA* or "NAVIGATOR ISLAND*" or "SAO TOME" or SENEGAL or SERBIA or MONTENEGRO or "SIERRA LEONE" or "SOLOMON | 1397566 |

|                                 |    |                                                                                                                                                                                                                                                                                                                                                                                                                                                                                                                                                                                                                                                                                                                                                                                                                                                                                                                                                                                                                                                                                                                                                                                                                                                                                                                                                                                                                                                                                                              |          |
|---------------------------------|----|--------------------------------------------------------------------------------------------------------------------------------------------------------------------------------------------------------------------------------------------------------------------------------------------------------------------------------------------------------------------------------------------------------------------------------------------------------------------------------------------------------------------------------------------------------------------------------------------------------------------------------------------------------------------------------------------------------------------------------------------------------------------------------------------------------------------------------------------------------------------------------------------------------------------------------------------------------------------------------------------------------------------------------------------------------------------------------------------------------------------------------------------------------------------------------------------------------------------------------------------------------------------------------------------------------------------------------------------------------------------------------------------------------------------------------------------------------------------------------------------------------------|----------|
|                                 |    | ISLANDS" or SOMALIA or "SOUTH AFRICA" or "SRI LANKA" or "S* LUCIA" or "ST. VINCENT AND THE GRENADINES" or SUDAN or SURINAM* or SWAZILAND or SYRIA* or TAJIKISTAN or TADZHIK* or TADJIKISTAN or TANZANIA or THAILAND or TIMOR-LESTE or TOGO* or TONGA or TUNISIA or TURKEY or TURKMEN* or TUVALU or UGANDA or UKRAINE or UZBEK* or VANUATU or VENEZUELA or VIETNAM or "VIET NAM" or "WEST BANK" or YEMEN or ZAMBIA or ZIMBABWE or RHODESIA).ti,ab.                                                                                                                                                                                                                                                                                                                                                                                                                                                                                                                                                                                                                                                                                                                                                                                                                                                                                                                                                                                                                                                            |          |
|                                 | 31 | OR (24 to 30)                                                                                                                                                                                                                                                                                                                                                                                                                                                                                                                                                                                                                                                                                                                                                                                                                                                                                                                                                                                                                                                                                                                                                                                                                                                                                                                                                                                                                                                                                                | 1600851  |
| <i>Decision/Policy making</i>   | 32 | (polic* or decision-mak* or "decision making" or decision-support or decision-process or decision-aid* or implement* or impact).ti,ab.                                                                                                                                                                                                                                                                                                                                                                                                                                                                                                                                                                                                                                                                                                                                                                                                                                                                                                                                                                                                                                                                                                                                                                                                                                                                                                                                                                       | 1856619  |
| <i>Noncommunicable diseases</i> | 35 | ((NCD* or "noncommunicable disease" or "non-communicable disease" or "chronic disease" or "chronic illness" or "cardiovascular disease" or stroke or "heart attack" or cancer* or "respiratory disease*" or "chronic obstructive pulmonary disease" or COPD or asthma or diabet* or alcohol or drink* or smok* or tobacco or "physical inactivity" or "unhealthy diet" or obes* or "mental health" or "hypertension" or "depression") or (neoplasm* or "musculoskeletal disease" or "digestive system disease" or "stomatognathic disease" or "respiratory tract diseases" or "Otorhinolaryngologic disease" or "Nervous system disease" or "Eye disease" or "Male urogenital disease" or "Female urogenital disease" or "pregnancy complications" or "Hemic and lymphatic disease" or "Congenital disease" or "hereditary disease" or "neonatal disease" or "Congenital abnormalities" or "hereditary abnormalities" or "neonatal abnormalities" or "Skin disease" or "Connective tissue disease" or "Nutritional disease" or "metabolic disease" or "Endocrine system disease" or "Immune system disease" or "Mental disorder") or ("bone disease" or "joint disease" or "rheumatic disease" or "liver disease" or "pancreatic disease" or "mouth disease" or "lung disease" or "central nervous system disease" or "neuromuscular disease" or "vision disorder" or "heart disease" or "vascular disease" or "anemia" or "blood coagulation disorder" or "thyroid disease" or "autoimmune disease").ti,ab. | 5575472  |
|                                 | 36 | 33 OR 34 OR 35                                                                                                                                                                                                                                                                                                                                                                                                                                                                                                                                                                                                                                                                                                                                                                                                                                                                                                                                                                                                                                                                                                                                                                                                                                                                                                                                                                                                                                                                                               | 12157808 |
| <i>Relating to health</i>       | 37 | (health* or medical or hospital or clinic* or treatment).ti,ab.                                                                                                                                                                                                                                                                                                                                                                                                                                                                                                                                                                                                                                                                                                                                                                                                                                                                                                                                                                                                                                                                                                                                                                                                                                                                                                                                                                                                                                              | 11375649 |
|                                 | 38 | 23 AND 31 AND 32 AND 36 AND 37                                                                                                                                                                                                                                                                                                                                                                                                                                                                                                                                                                                                                                                                                                                                                                                                                                                                                                                                                                                                                                                                                                                                                                                                                                                                                                                                                                                                                                                                               | 2601     |
|                                 | 39 | Limit 38 to English and 2015-18                                                                                                                                                                                                                                                                                                                                                                                                                                                                                                                                                                                                                                                                                                                                                                                                                                                                                                                                                                                                                                                                                                                                                                                                                                                                                                                                                                                                                                                                              | 1085     |

### Medline

| <b>Ovid MEDLINE – Search run on 10<sup>th</sup> May 2018</b> |    |                                                                                                                                                                                      |             |
|--------------------------------------------------------------|----|--------------------------------------------------------------------------------------------------------------------------------------------------------------------------------------|-------------|
|                                                              |    | <b>MeSH subject headings/Custom search<br/>Explode and Focus all subject headings</b>                                                                                                | <b>Hits</b> |
| <i>Model types</i>                                           | 1  | Decision support techniques                                                                                                                                                          | 22987       |
|                                                              | 2  | Models, economic                                                                                                                                                                     | 4456        |
|                                                              | 3  | Models, econometric                                                                                                                                                                  | 1296        |
|                                                              | 4  | Monte Carlo method                                                                                                                                                                   | 4021        |
|                                                              | 5  | Markov chains                                                                                                                                                                        | 2061        |
|                                                              | 6  | Stochastic processes                                                                                                                                                                 | 3864        |
|                                                              | 7  | Algorithms                                                                                                                                                                           | 110470      |
|                                                              | 8  | Decision theory                                                                                                                                                                      | 2073        |
|                                                              | 9  | Decision trees                                                                                                                                                                       | 1660        |
|                                                              | 10 | Operations research                                                                                                                                                                  | 10659       |
|                                                              | 11 | Systems theory                                                                                                                                                                       | 1200        |
|                                                              | 12 | Computing methodologies                                                                                                                                                              | 386807      |
|                                                              | 13 | Computer simulation                                                                                                                                                                  | 45396       |
|                                                              | 14 | Mathematical computing                                                                                                                                                               | 2815        |
|                                                              | 15 | Numerical analysis, computer-assisted                                                                                                                                                | 1340        |
|                                                              | 16 | Systems analysis                                                                                                                                                                     | 18350       |
|                                                              | 17 | Probability theory                                                                                                                                                                   | 172         |
|                                                              | 18 | Programming, linear                                                                                                                                                                  | 202         |
|                                                              | 19 | Cost-benefit analysis                                                                                                                                                                | 6877        |
|                                                              | 20 | Health services research                                                                                                                                                             | 48446       |
|                                                              | 21 | Decision-making, organizational                                                                                                                                                      | 3720        |
|                                                              | 22 | ((operation* adj1 research) OR (model* adj5 (mathematical or queu* or inventory or scheduling or demand or forecast* or comput* or network or stochastic or decision* or delivery or | 267554      |

|                         |    |                                                                                                                                                                                                                                                                                                                                                                                                                                                                                                                                                                                                                                                                                                                                                                                                                                                                                                                                                                                                                                                                                                                                                                                                                                                                                                                                                                                                                                                                                                                                                                                                             |         |
|-------------------------|----|-------------------------------------------------------------------------------------------------------------------------------------------------------------------------------------------------------------------------------------------------------------------------------------------------------------------------------------------------------------------------------------------------------------------------------------------------------------------------------------------------------------------------------------------------------------------------------------------------------------------------------------------------------------------------------------------------------------------------------------------------------------------------------------------------------------------------------------------------------------------------------------------------------------------------------------------------------------------------------------------------------------------------------------------------------------------------------------------------------------------------------------------------------------------------------------------------------------------------------------------------------------------------------------------------------------------------------------------------------------------------------------------------------------------------------------------------------------------------------------------------------------------------------------------------------------------------------------------------------------|---------|
|                         |    | simulation or optimi#ation or linear or nonlinear or non-linear or Markov or cost-effectiveness or agent-based)) OR<br>(optimi#ation\$1 adj5 (mathematical or nonlinear or non-linear or linear or network or discrete or multi-criteria or multicriteria or stochastic or problem or minimi#ation or maximi#ation or location or allocation)) OR<br>(simulation adj3 (comput* or discrete or agent-based or system\$1))) .ti,ab.                                                                                                                                                                                                                                                                                                                                                                                                                                                                                                                                                                                                                                                                                                                                                                                                                                                                                                                                                                                                                                                                                                                                                                           |         |
|                         | 23 | OR (1 to 22)                                                                                                                                                                                                                                                                                                                                                                                                                                                                                                                                                                                                                                                                                                                                                                                                                                                                                                                                                                                                                                                                                                                                                                                                                                                                                                                                                                                                                                                                                                                                                                                                | 715031  |
| <i>Geographic focus</i> | 24 | Following MeSH terms exploded and focused:<br>Africa; (From "Caribbean Region") Cuba, Dominica, Dominican Republic, Grenada, Haiti, Jamaica, Saint Lucia, Saint Vincent and the Grenadines; Central America; (From "North America") Mexico;<br>South America; Asia, Central; (From "Asia, Northern") Russia; (From "Asia, Southeastern") Cambodia, Timor-Leste, Indonesia, Laos, Malaysia, Myanmar, Philippines, Thailand, Vietnam;<br>(From "Asia, Western") Bangladesh, Bhutan, India, Nepal, Pakistan, Sri Lanka;<br>(From "Middle East") Afghanistan, Iran, Iraq, Jordan, Lebanon, Syria, Turkey, Yemen;<br>(From "Far East") China, Mongolia;<br>(From "Europe, Eastern") Albania, Bosnia and Herzegovina, Bulgaria, Kosovo, Macedonia, Moldova, Montenegro, Belarus, Romania, Russia, Serbia, Ukraine;<br>Transcaucasia; (From "Islands/Pacific Islands/Melanesia") Fiji, Papua New Guinea, Vanuatu; (From "Polynesia") Samoa, Tonga                                                                                                                                                                                                                                                                                                                                                                                                                                                                                                                                                                                                                                                                  | 64      |
|                         | 25 | ("low-resource setting*" or "resource-constrained setting*" or "resource-poor setting*" or "limited-resource setting*" or "resource-limited setting*" or Africa* or (Asia* adj2 south) or (Asia adj2 east) or "latin America*" or "central America*" or "south america*" or caribbean or "west indies" or "middle east") .ti,ab.                                                                                                                                                                                                                                                                                                                                                                                                                                                                                                                                                                                                                                                                                                                                                                                                                                                                                                                                                                                                                                                                                                                                                                                                                                                                            | 260978  |
|                         | 26 | ((count* or nation* or population* or world) adj0 (developing or "less* developed" or "under developed" or "least-developed" or underdeveloped or "middle income" or "middle-income" or "low-income" or "low* income" or underserved or "under served" or deprived or poor*)) .ti,ab.                                                                                                                                                                                                                                                                                                                                                                                                                                                                                                                                                                                                                                                                                                                                                                                                                                                                                                                                                                                                                                                                                                                                                                                                                                                                                                                       | 712     |
|                         | 27 | (econom* adj0 (developing or "less* developed" or "under developed" or underdeveloped or "middle income" or middle-income or "low* income" or low-income)) .ti,ab.                                                                                                                                                                                                                                                                                                                                                                                                                                                                                                                                                                                                                                                                                                                                                                                                                                                                                                                                                                                                                                                                                                                                                                                                                                                                                                                                                                                                                                          | 185     |
|                         | 28 | (low* adj0 (gdp or gnp or "gross domestic" or "gross national")) .ti,ab.                                                                                                                                                                                                                                                                                                                                                                                                                                                                                                                                                                                                                                                                                                                                                                                                                                                                                                                                                                                                                                                                                                                                                                                                                                                                                                                                                                                                                                                                                                                                    | 214     |
|                         | 29 | (lmic* or third world or lami countr* or transitional countr*) .ti,ab.                                                                                                                                                                                                                                                                                                                                                                                                                                                                                                                                                                                                                                                                                                                                                                                                                                                                                                                                                                                                                                                                                                                                                                                                                                                                                                                                                                                                                                                                                                                                      | 5637    |
|                         | 30 | (AFGHANISTAN or ALBANIA or ALGERIA or "AMERICAN SAMOA" or ANGOLA or ARGENTINA or ARMENIA or ARMENIAN or AZERBAIJAN or BANGLADESH or BELARUS or BYELARUS or BYELORUSSIAN or BELORUSSIA* or BELIZE or BENIN or BHUTAN or BOLIVIA or BOSNIA or "BOSNIA AND HERZEGOVINA" or HERZEGOVINA or HERCEGOVINA or BOTSWANA or BRASIL or BRAZIL or BULGARIA or "BURKINA FAS#O" or BURUNDI or URINDI or CAMBODIA or "KHMER REPUBLIC" or "KAMPUCHEA or CAMERO*" or "CAPE VERDE" OR "CABO VERDE" or "CENTRAL AFRICAN REPUBLIC" or CHAD or CHINA or COLOMBIA or COMOR* or "COMORO ISLANDS" or MAYOTTE or CONGO or ZAIRE or "COSTA RICA" or "COTE D'IVOIRE" or "IVORY COAST" or CUBA or DJIBOUTI or "FRENCH SOMALILAND" or DOMINICA* or ECUADOR or EGYPT or "UNITED ARAB REPUBLIC" or "EL SALVADOR" or "EQUATORIAL GUINEA" or ERITREA or ETHIOPIA or FIJI or GABON* or GAMBIA or GEORGIA* or GHANA or GRENADA or GUATEMALA or GUINEA or GUAM or GUINEA-BISSAU or GUIANA or GUYANA or HAITI or HONDURAS or INDIA or MALDIVES or INDONESIA or IRAN<br><br>or IRAQ or JAMAICA or JORDAN or KAZAKH* or KENYA or KIRIBATI or KOREA or KOSOVO or KYRGYZ* or KIRGHIZ* or KIRGIZSTAN or LAO* or LEBANON or LESOTHO or BASUTOLAND or LIBERIA or LIBYA or MACEDONIA or MADAGASCAR or MALAGASY or MALAWI or MALAY* or SABAH or SARAWAK or MALDIVES or MALI or "MARSHALL ISLANDS" or MAURITANIA or MAURITIUS or "AGALEGA ISLANDS" or MEXICO or MICRONESIA or "MIDDLE EAST" or MOLDOV* or MONGOLIA or MONTENEGRO or MOROCCO or IFNI or MOZAMBIQUE or MYANMA* or BURMA or NAMIBIA or NEPAL or "NETHERLANDS ANTILLES" or NICARAGUA or NIGER* | 1063597 |

|                                 |    |                                                                                                                                                                                                                                                                                                                                                                                                                                                                                                                                                                                                                                                                                                                                                                                                                                                                                                                                                                                                                                                                                                                                                                                                                                                                                                                                                                                                                                                                                                              |          |
|---------------------------------|----|--------------------------------------------------------------------------------------------------------------------------------------------------------------------------------------------------------------------------------------------------------------------------------------------------------------------------------------------------------------------------------------------------------------------------------------------------------------------------------------------------------------------------------------------------------------------------------------------------------------------------------------------------------------------------------------------------------------------------------------------------------------------------------------------------------------------------------------------------------------------------------------------------------------------------------------------------------------------------------------------------------------------------------------------------------------------------------------------------------------------------------------------------------------------------------------------------------------------------------------------------------------------------------------------------------------------------------------------------------------------------------------------------------------------------------------------------------------------------------------------------------------|----------|
|                                 |    | or "NORTHERN MARIANA ISLANDS" or PAKISTAN or PANAMA or "PAPUA NEW GUINEA" or PARAGUAY or PERU or PHI#LIP#INES or ROMANIA or RUMANIA or ROUMANIA or RUSSIA* or R#ANDA or SAMOA* or "NAVIGATOR ISLAND*" or "SAO TOME" or SENEGAL or SERBIA or MONTENEGRO or "SIERRA LEONE" or "SOLOMON ISLANDS" or SOMALIA or "SOUTH AFRICA" or "SRI LANKA" or "S* LUCIA" or "ST. VINCENT AND THE GRENADINES" or SUDAN or SURINAM* or SWAZILAND or SYRIA* or TAJIKISTAN or TADZHIK* or TADJIKISTAN or TANZANIA or THAILAND or TIMOR-LESTE or TOGO* or TONGA or TUNISIA or TURKEY or TURKMEN* or TUVALU or UGANDA or UKRAINE or UZBEK* or VANUATU or VENEZUELA or VIETNAM or "VIET NAM" or "WEST BANK" or YEMEN or ZAMBIA or ZIMBABWE or RHODESIA).ti,ab.                                                                                                                                                                                                                                                                                                                                                                                                                                                                                                                                                                                                                                                                                                                                                                       |          |
|                                 | 31 | OR(24 to 30)                                                                                                                                                                                                                                                                                                                                                                                                                                                                                                                                                                                                                                                                                                                                                                                                                                                                                                                                                                                                                                                                                                                                                                                                                                                                                                                                                                                                                                                                                                 | 1068196  |
| <i>Decision/Policy making</i>   | 32 | (polic* or decision-mak* or "decision making" or decision-support or decision-process or decision-aid* or implement* or impact).ti,ab.                                                                                                                                                                                                                                                                                                                                                                                                                                                                                                                                                                                                                                                                                                                                                                                                                                                                                                                                                                                                                                                                                                                                                                                                                                                                                                                                                                       | 1383086  |
| <i>Noncommunicable diseases</i> | 33 | Following MeSH terms exploded and focused:<br>Neoplasms; Musculoskeletal diseases; Digestive system diseases; Stomatognathic diseases; Respiratory tract diseases; Otorhinolaryngologic diseases; Nervous system diseases; Eye diseases; Male urogenital diseases; Female urogenital diseases and pregnancy complications; Cardiovascular diseases; Hemic and lymphatic diseases; Congenital, hereditary, and neonatal diseases and abnormalities; Skin and connective tissue diseases; Nutritional and metabolic diseases; Endocrine system diseases; Immune system diseases; Mental Disorders                                                                                                                                                                                                                                                                                                                                                                                                                                                                                                                                                                                                                                                                                                                                                                                                                                                                                                              | 10884546 |
|                                 | 34 | Mesh Term: noncommunicable diseases                                                                                                                                                                                                                                                                                                                                                                                                                                                                                                                                                                                                                                                                                                                                                                                                                                                                                                                                                                                                                                                                                                                                                                                                                                                                                                                                                                                                                                                                          | 167      |
|                                 | 35 | ((NCD* or "noncommunicable disease" or "non-communicable disease" or "chronic disease" or "chronic illness" or "cardiovascular disease" or stroke or "heart attack" or cancer* or "respiratory disease*" or "chronic obstructive pulmonary disease" or COPD or asthma or diabet* or alcohol or drink* or smok* or tobacco or "physical inactivity" or "unhealthy diet" or obes* or "mental health" or "hypertension" or "depression") or (neoplasm* or "musculoskeletal disease" or "digestive system disease" or "stomatognathic disease" or "respiratory tract diseases" or "Otorhinolaryngologic disease" or "Nervous system disease" or "Eye disease" or "Male urogenital disease" or "Female urogenital disease" or "pregnancy complications" or "Hemic and lymphatic disease" or "Congenital disease" or "hereditary disease" or "neonatal disease" or "Congenital abnormalities" or "hereditary abnormalities" or "neonatal abnormalities" or "Skin disease" or "Connective tissue disease" or "Nutritional disease" or "metabolic disease" or "Endocrine system disease" or "Immune system disease" or "Mental disorder") or ("bone disease" or "joint disease" or "rheumatic disease" or "liver disease" or "pancreatic disease" or "mouth disease" or "lung disease" or "central nervous system disease" or "neuromuscular disease" or "vision disorder" or "heart disease" or "vascular disease" or "anemia" or "blood coagulation disorder" or "thyroid disease" or "autoimmune disease").ti,ab. | 4027990  |
|                                 | 36 | 33 OR 34 OR 35                                                                                                                                                                                                                                                                                                                                                                                                                                                                                                                                                                                                                                                                                                                                                                                                                                                                                                                                                                                                                                                                                                                                                                                                                                                                                                                                                                                                                                                                                               | 12157808 |
| <i>Relating to health</i>       | 37 | (health* or medical or hospital or clinic* or treatment).ti,ab.                                                                                                                                                                                                                                                                                                                                                                                                                                                                                                                                                                                                                                                                                                                                                                                                                                                                                                                                                                                                                                                                                                                                                                                                                                                                                                                                                                                                                                              | 8571581  |
|                                 | 38 | 23 AND 31 AND 32 AND 36 AND 37                                                                                                                                                                                                                                                                                                                                                                                                                                                                                                                                                                                                                                                                                                                                                                                                                                                                                                                                                                                                                                                                                                                                                                                                                                                                                                                                                                                                                                                                               | 2601     |
|                                 | 39 | Limit 38 to English and 2015-18                                                                                                                                                                                                                                                                                                                                                                                                                                                                                                                                                                                                                                                                                                                                                                                                                                                                                                                                                                                                                                                                                                                                                                                                                                                                                                                                                                                                                                                                              | 1123     |

\* Income level as specified by World Bank in 2018 <https://datahelpdesk.worldbank.org/knowledgebase/articles/906519-world-bank-country-and-lending-groups>; LI: low-income economy; LMI: lower-middle-income economy; UMI: upper-middle-income economy; HI: high-income economy  
BOD: burden of disease; BMI: body mass index; CEA: cost-effectiveness analysis; CI: confidence interval; COI: cost-of-illness; CUA: cost-utility analysis; CVD: cardiovascular disease; DALY: disability-adjusted life year; ICER: incremental cost-effectiveness ratio; MI: myocardial infarction; QALY: quality-adjusted life year; SES: socioeconomic status; UI: uncertainty interval; WTP: willingness to pay
